# Supplementary material
Source: publisher figshare collection journal article supplement (https://acs.figshare.com/ndownloader/files/4763866)

## Supporting Information

### Synthesis and photoluminescence of Cd-doped $\alpha$ -MnS nanowires

*Dae Sung Kim, Jin Young Kim, Chan Woong Na, Sang Won Yoon, Shin Young Kim, Jeunghye Park<sup>a)</sup>, Younghun Jo, and Myung-Hwa Jung*

**Figure S1:** Temperature-dependent ZFC and FC magnetic susceptibility ( $\chi$ ) of MnS powders (Aldrich, 99.9 %), measured with  $H=5$  kOe. It shows  $T_N=154$  K.

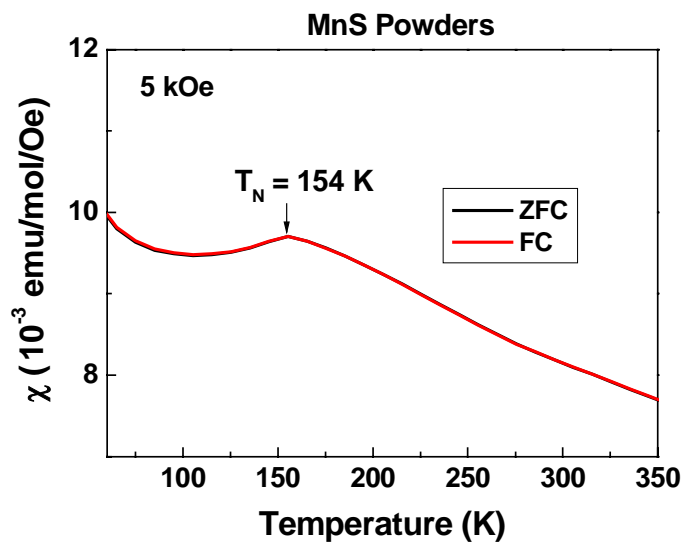

**Figure S2:** Temperature-dependent XRD (200) and (220) peaks of MnS powders and MnS NWs. The MnS powders show a discontinuous change of the peak position near 150 K, indicating a phase transition (probably rhombohedral or trigonal distortion) accompanying to the antiferromagnetic ordering ( $T_N=154$  K). In contrast, there is no obvious transition of the peak position for the MnS NWs.

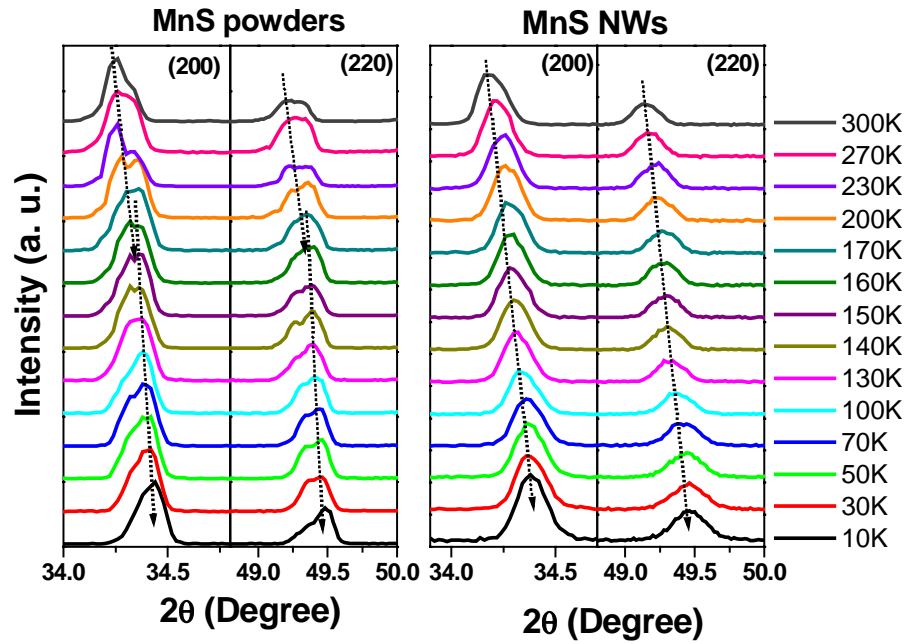

Supplement: Supplementary file 1 [file 4763866]
